# Supplementary material for: A protein nanocomposite for ultra-fast, efficient and non-irritating skin decontamination of nerve agents
Source: Royal Society of Chemistry journal article supplement (doi:10.1039/c9nr09015k), 2020-01-01
Supplement: c9nr09015k1.pdf [file c9nr09015k1.pdf]

## Supporting Information

### A Protein Nanocomposite for Ultra-fast, Efficient and Non-irritating Skin Decontamination from Nerve Agents

*Jiapeng Wang, Yao Li, Jingyi Huang, Wanhua Li, Yuan Luo, Xin Sui, Jin Li, Yongan Wang\* and Jun Yang\**

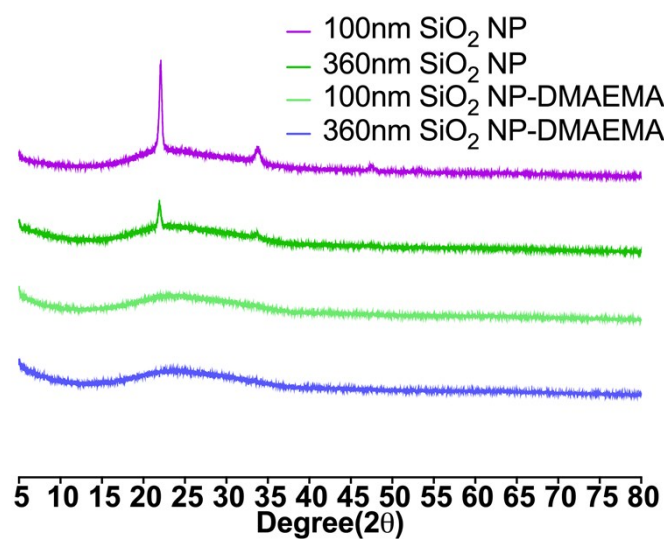

Figure S1 XRD of the SiO<sub>2</sub> NP nanocomposite (from top to down): SiO<sub>2</sub> NP (100 nm diameter), SiO<sub>2</sub> NP (360 nm diameter), SiO<sub>2</sub> NP-DMAEMA (100 nm diameter) and SiO<sub>2</sub> NP-DMAEMA (360 nm diameter)

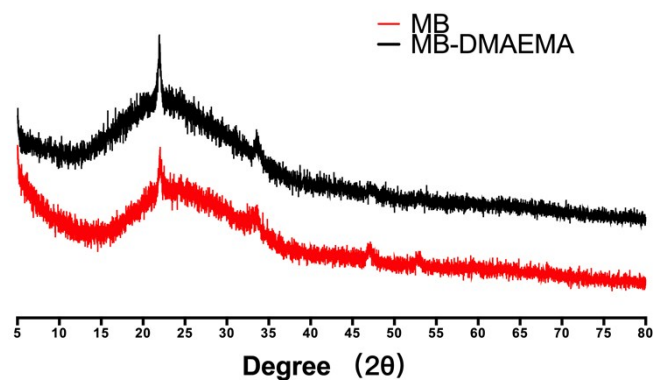

Figure S2 XRD of the Mb (red) and Mb-DMAEMA (black).

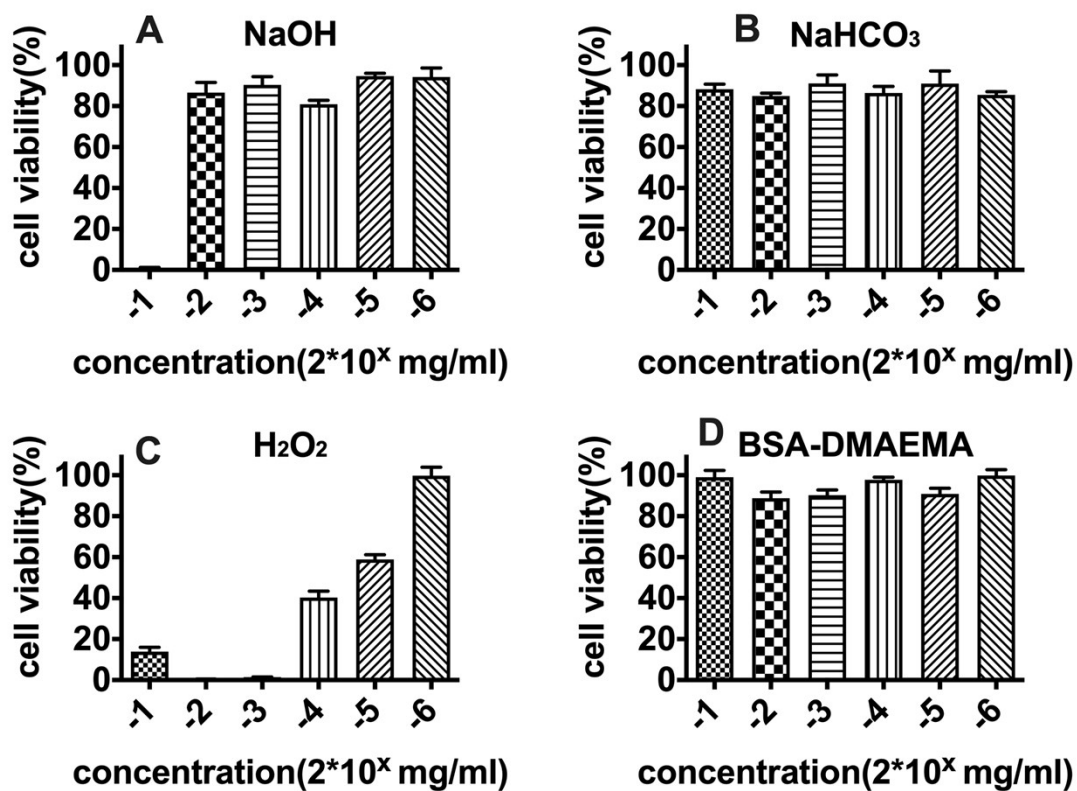

Figure S3 cytotoxicity of keratinocyte incubated with (A) NaOH, (B) NaHCO<sub>3</sub> (C) H<sub>2</sub>O<sub>2</sub> (D) BSA-DMAEMA

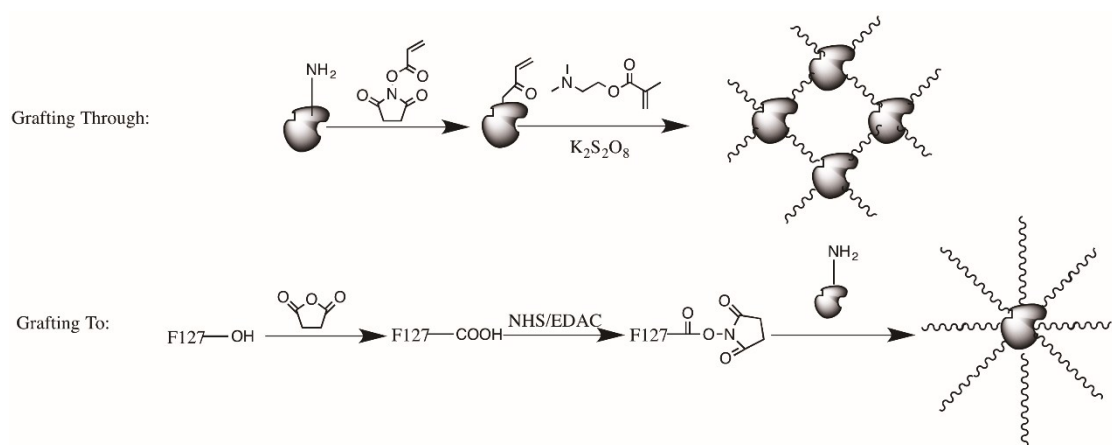

**Scheme S1.** Schematic showing the two methods of linking polymers to proteins: “grafting through” and “grafting to”.
